# Supplementary material for: Capture of microparticles by bolus flow of red blood cells in capillaries
Source: PubMed Central journal article supplement (PMC5511268; doi:10.1038/s41598-017-05924-7), 2017-07-14
Supplement: 41598_2017_5924_MOESM1_ESM.pdf [file 41598_2017_5924_MOESM1_ESM.pdf]

# Capture of microparticles by bolus flow of red blood cells in capillaries

Naoki Takeishi and Yohsuke Imai

## Supplemental Movies

**Supplemental Movie S1:** The flow of MPs and RBCs for  $Hct = 0.2$  and  $Ca = 0.2$  in microvessels with a diameter  $D = 8 \mu\text{m}$ .

**Supplemental Movie S2:** The flow of MPs and RBCs for  $Hct = 0.2$  and  $Ca = 0.2$  in microvessels with a diameter  $D = 10 \mu\text{m}$ .

**Supplemental Movie S3:** The flow of MPs and RBCs for  $Hct = 0.2$  and  $Ca = 0.2$  in microvessels with a diameter  $D = 12 \mu\text{m}$ .

**Supplemental Movie S4:** The flow of MPs and RBCs for  $Hct = 0.2$  and  $Ca = 0.2$  in microvessels with a diameter  $D = 22 \mu\text{m}$ .

**Supplemental Movie S5:** The flow of MPs and RBCs for  $Hct = 0.1$  and  $Ca = 0.2$  in microvessels with diameters  $D = 10 \mu\text{m}$  (top) and  $D = 12 \mu\text{m}$  (bottom).

**Supplemental Movie S6:** The flow of MPs and RBCs for  $Hct = 0.05$  and  $Ca = 0.2$  in microvessels with diameters  $D = 10 \mu\text{m}$  (top) and  $D = 12 \mu\text{m}$  (bottom).

**Supplemental Movie S7:** The flow of MPs and RBCs at  $Hct = 0.2$  in a microvessel

with a diameter  $D = 8 \mu\text{m}$  for  $Ca = 0.05$  (top) and  $Ca = 0.4$  (bottom).
